# Supplementary material for: Gender Differences in Age-Related Striatal Dopamine Depletion in Parkinson’s Disease
Source: PubMed Central journal article supplement — J Mov Disord. 2015 Sep 10;8(3):130–5. doi: 10.14802/jmd.15031 (PMC4572663; doi:10.14802/jmd.15031), 2015-09-10
Supplement: jmd-8-3-130-supple1.pdf [file jmd-8-3-130-supple1.pdf]

**Supplementary Table 1.** Estimated slopes of age-related DAT decline in the striatal sub-regions

| Striatal sub-regions | Men ( <i>n</i> = 152) | Women ( <i>n</i> = 155) | <i>p</i> * |
|----------------------|-----------------------|-------------------------|------------|
| Anterior caudate     | -0.018 (0.006)        | -0.043 (0.007)          | 0.004      |
| Posterior caudate    | -0.011 (0.004)        | -0.03 (0.005)           | 0.002      |
| Ventral striatum     | -0.008 (0.005)        | -0.022 (0.006)          | 0.073      |
| Anterior putamen     | -0.002 (0.005)        | -0.023 (0.006)          | 0.012      |
| Posterior putamen    | 0.002 (0.004)         | -0.003 (0.004)          | 0.342      |
| Ventral putamen      | -0.004 (0.003)        | -0.012 (0.004)          | 0.097      |

Data are estimated slopes (SEs). \*adjusted for age of PET scans, symptom duration, and UPDRS-motor scores. UPDRS: Unified Parkinson's Disease Rating Scale, DAT: dopamine transporter, PET: positron emission tomography, SE: standard error.
